# Supplementary material
Source: HighWire-hosted journal article supplement (https://genome.cshlp.org/content/suppl/2004/11/08/14.12.2439)

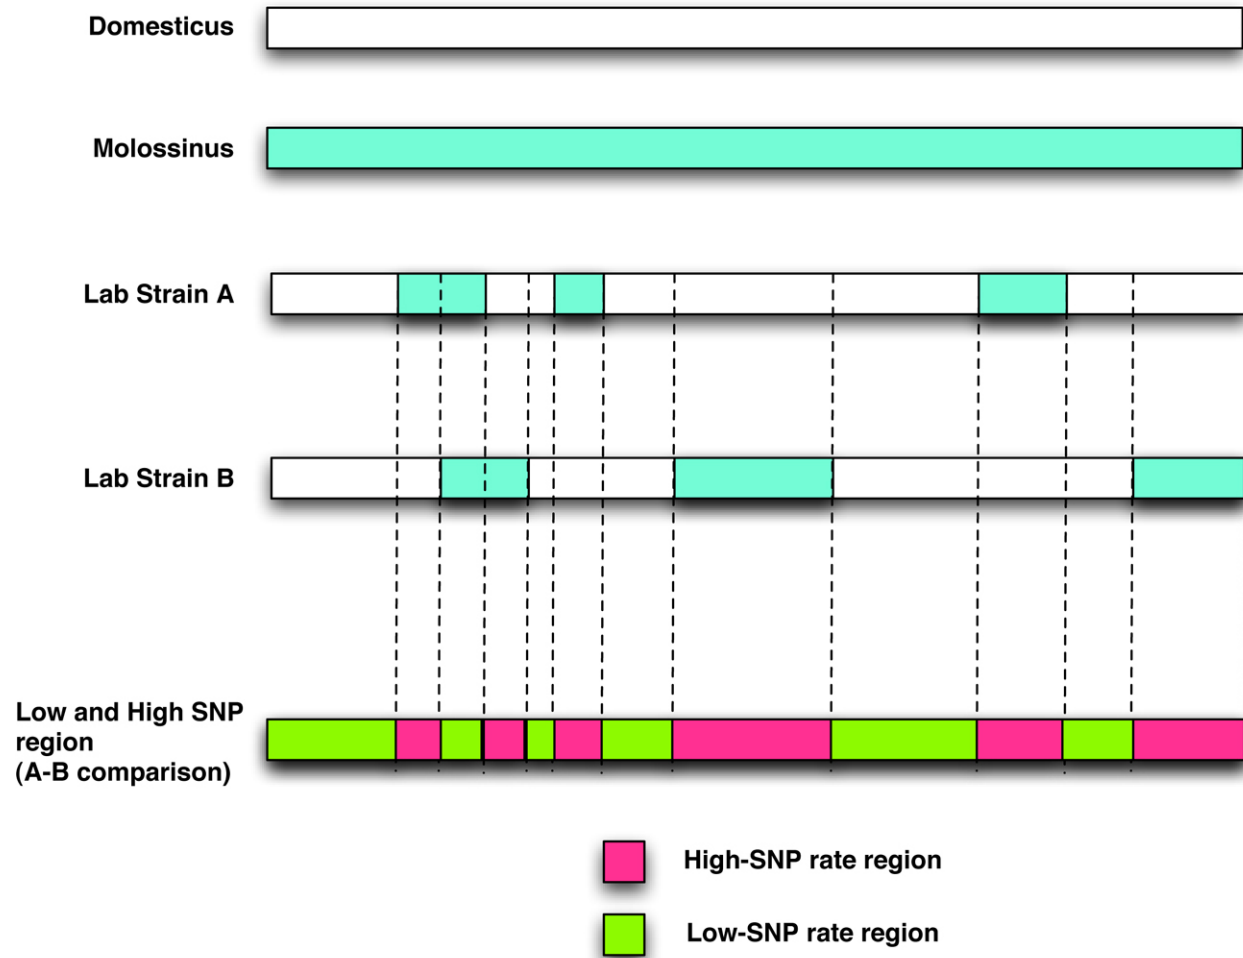

Supplement: Fig1.S2.pdf [file Fig1.S2.pdf]
